# Supplementary material for: RORα Regulates Cholesterol Metabolism of CD8+ T Cells for Anticancer Immunity
Source: MDPI journal article supplement (doi:10.3390/cancers12071733), 2020-06-29
Supplement: s1 [file s1]

# ROR $\alpha$ Regulates Cholesterol Metabolism of CD8 $^{+}$ T Cell for Anti-Cancer Immunity

In Kyu Lee, Hyerin Song, Hyerim Kim, Ik Soo Kim, Na Ly Tran, Sang-Heon Kim, Seung Ja Oh and Ji Min Lee

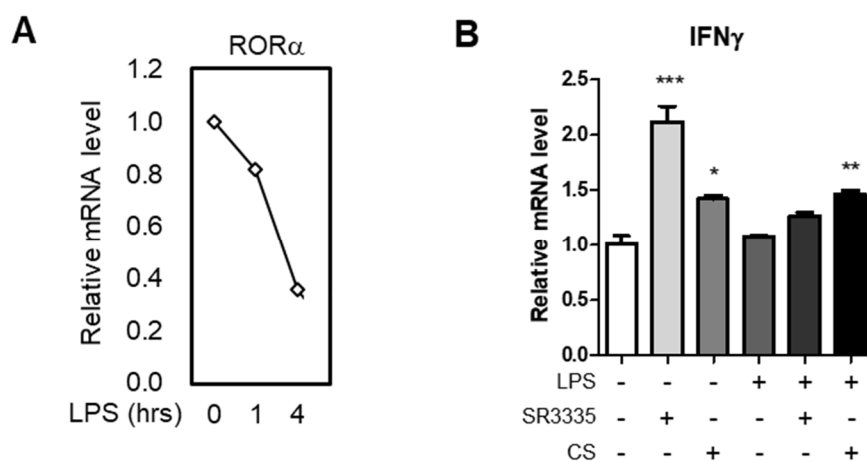

**Figure S1.** LPS treatment effects on mRNA levels of ROR $\alpha$  and IFN- $\gamma$  in each MEFs and Jurkat cells. (A) Transcriptional levels of mouse ROR $\alpha$  in LPS-mediated stimulated MEFs as indicated activation times. (B) Transcriptional levels of IFN- $\gamma$  in Jurkat cells treated with LPS, SR3335, and CS.

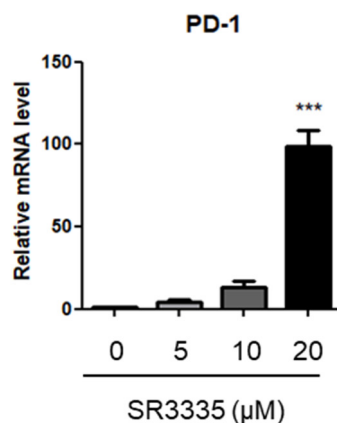

**Figure S2.** SR3335 treatment increased the mRNA levels of PD-1. Transcriptional levels of PD-1 in Jurkat cells treated with SR3335.

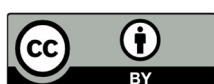

© 2020 by the authors. Licensee MDPI, Basel, Switzerland. This article is an open access article distributed under the terms and conditions of the Creative Commons Attribution (CC BY) license (<http://creativecommons.org/licenses/by/4.0/>).
